# Supplementary material
Source: Springer Nature journal article supplement (https://www.springermedizin.de/resource/supplementary/12990_2010_351_MOESM1_ESM.pdf/9613096)

A

Monosynaptic A $\delta$ -eEPSC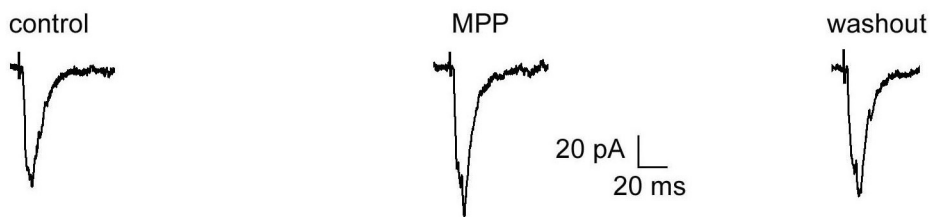

B

## Monosynaptic C-eEPSC

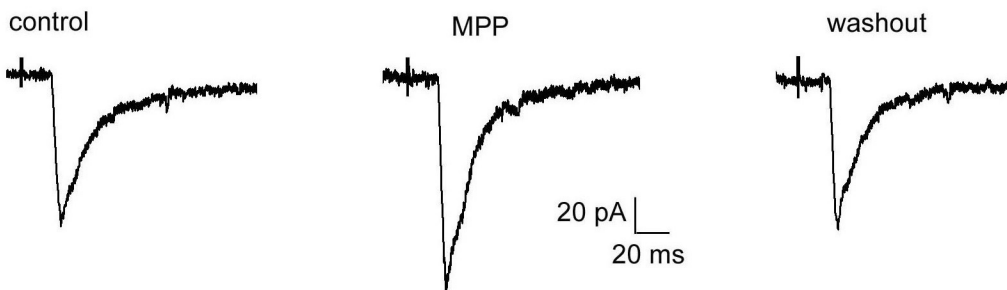

C

Monosynaptic A $\delta$ -and C-eEPSC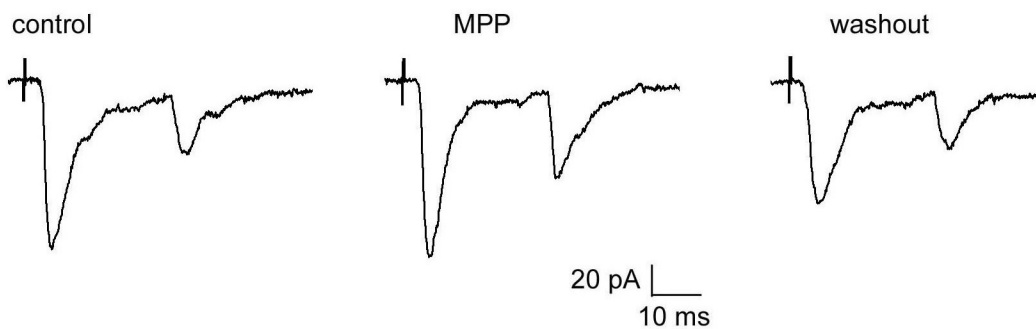

D

Monosynaptic A $\delta$ -eEPSC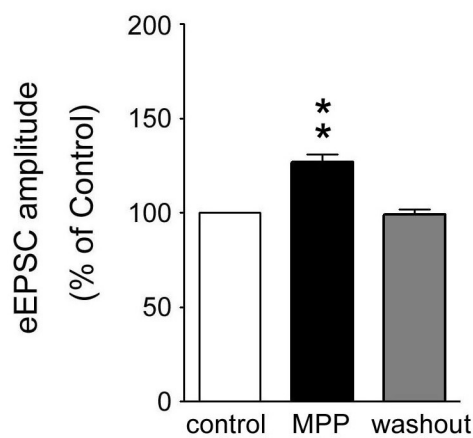

## Monosynaptic C-eEPSC

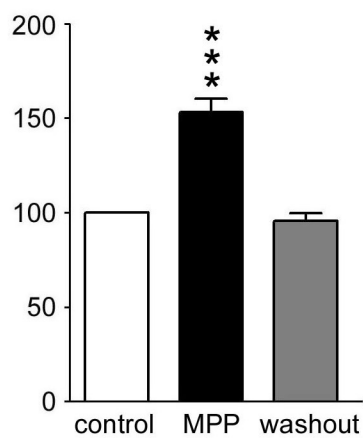

Supplement: MOESM1 [file 9613096]
